# Supplementary material for: Low-density lipoprotein receptor expression is involved in the beneficial effect of photodynamic therapy using talaporfin sodium on gastric cancer cells
Source: PubMed Central journal article supplement — Oncol Lett. 2019 Feb 1;17(3):3261–6. doi: 10.3892/ol.2019.10004 (PMC6396135; doi:10.3892/ol.2019.10004), 2019-02-01

Figure S1. LDL receptor expression by western blotting. Cells were treated with 50 nM LDL receptor siRNA and Non-targeting Pool for 48 h. ON-TARGETplus Human LDL receptor (3949) siRNA (L-011073-00-0005), ON-TARGETplus Non-targeting Pool (D-001810-10-05) (both from Dharmacon, Inc., Lafayette, CO, USA) and Lipofectamine™ RNAiMAX Transfection Reagent (13778030; Thermo Fisher Scientific, Inc., Tokyo, Japan) were used. LDL, low-density lipoprotein; siRNA, small interfering RNA.

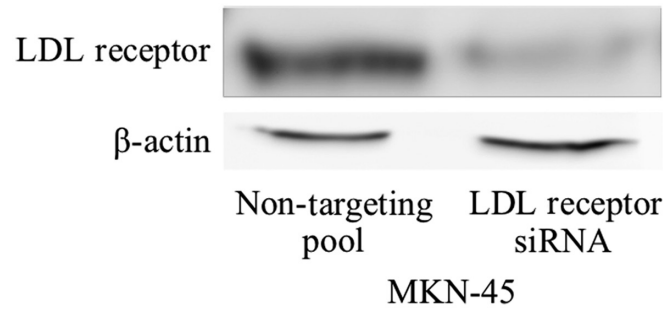

Supplement: Supplementary_Data.pdf [file Supplementary_Data.pdf]
